# Supplementary material for: Pembrolizumab and Olaparib (POLAR) Maintenance Therapy in Metastatic Pancreatic Cancer With or Without Homologous Repair Deficiency: A Biomarker Selected Phase II Trial
Source: Research Square preprint supplement (doi:10.21203/rs.3.rs-7334701/v1), 2025-09-01
Supplement: Supplementary file 1 [file 51e6ee031334e41585076b17.xlsx]

## Sheet: mutation_level
Cohort	POLAR_ID	DDR_gene	Hugo_Symbol	Germline_Somatic_ACCESS_availability	Zygosity	Reversion_T3	note	Tumor_Purity	t_var_freq	t_ref_count	t_alt_count	n_ref_count	n_alt_count
A	A01	gBRCA2m	BRCA2	GS	Bilallelic	N	Compound somatic + germline	0.406055	0.716418	171	432	.	.
A	A02	gBRCA2m	BRCA2	GS	Bilallelic	Y	Reversion post-treatment	0.379834	0.636585	149	261	.	.
A	A03	gBRCA2m	BRCA2	cfDNA only	NA	N	ACCESS only
A	A04	gBRCA2m	BRCA2	cfDNA only	NA	N	ACCESS only
A	A05	gBRCA2m	BRCA2	GS	Bilallelic	N	Compound somatic + germline	0.27549	0.6625	162	318	.	.
A	A06	gPALB2m	PALB2	cfDNA only	NA	N	ACCESS only
A	A07	gBRCA2m	BRCA2	GS	Monoallelic	N	Manually reviewed in IGV; tumor VAF 51% (196 fs del, 191 ref)	0.274507	NA	0	0	.	.
A	A08	gBRCA2m	BRCA2	GS	Bilallelic	N	Manually reviewed in IGV; tumor VAF 66% (186 DEL, 95 ref)	0.410514	NA	0	0	.	.
A	A09	gBRCA1m	BRCA1	cfDNA only	NA	N	ACCESS only
A	A10	gPALB2m	PALB2	GS	Bilallelic	N	Compound somatic + germline	0.793244	0.800499	80	321	.	.
A	A11	gPALB2m	PALB2	cfDNA only	NA	N	ACCESS only
A	A12	gBRCA2m	BRCA2	cfDNA only	NA	N	ACCESS only
A	A13	gBRCA2m	BRCA2	Somatic_only	Monoallelic	N	Low purity (pathology estimate 20%) but likely monoallelic (tumor VAF = ~1/2 purity)	0.18	0.090301	272	27	249	0
A	A14	gBRCA1m	BRCA1	cfDNA only	NA	N	ACCESS only
A	A15	gPALB2m	PALB2	GS	Monoallelic	N	Manually reviewed in IGV; tumor VAF 50% (240 DEL, 240 ref)	0.252103	NA	0	0	.	.
A	A16	gBRCA2m	BRCA2	cfDNA only	NA	N	ACCESS only
A	A17	gBRCA1m	BRCA1	cfDNA only	NA	N	ACCESS only
A	A18	gBRCA1m	BRCA1	cfDNA only	NA	N	ACCESS only
A	A19	gPALB2m	PALB2	GS	Bilallelic	N	Compound somatic + germline	0.555632	0.381356	146	90	304	0
A	A20	gBRCA2m	BRCA2	cfDNA only	NA	N	ACCESS only
A	A21	gBRCA2m	BRCA2	GS	Bilallelic	Y	Potential reversion mutation in later ACCESS sample	0.23	0.517021	227	243	.	.
A	A22	gBRCA1m	BRCA1	GS	Indeterminate	N	Low purity (pathology estimate 10%)	0.190964	0.547393	191	231	.	.
A	A23	gBRCA2m	BRCA2	GS	Bilallelic	N	Manually reviewed in IGV; tumor VAF 80% (total count 277, 224 INS)	0.87	NA
A	A24	gBRCA2m	BRCA2	GS	Indeterminate	N	Low purity (pathology estimate 10%)	0.3	0.491429	178	172	.	.
A	A25	gBRCA2m	BRCA2	cfDNA only	NA	N	ACCESS only
A	A26	gBRCA1m	BRCA1	cfDNA only	NA	N	ACCESS only
A	A27	gBRCA2m	BRCA2	GS	Bilallelic	N	Compound somatic	0.3	0.272	273	102	430	0
A	A28	gPALB2m	PALB2	cfDNA only	NA	N	ACCESS only
A	A29	gBRCA1m	BRCA1	cfDNA only	NA	N	ACCESS only
A	A30	gBRCA1m	BRCA1	cfDNA only	NA	N	ACCESS only
A	A31	gBRCA1m	BRCA1	GS	Bilallelic	N	Compound somatic + germline	0.374866	0.205556	143	37	465	0
A	A32	gBRCA2m	BRCA2	cfDNA only	NA	N	ACCESS only
A	A33	gBRCA2m	BRCA2	cfDNA only	NA	N	ACCESS only
B	B01	gATMm	ATM	cfDNA only	NA	N	ACCESS only
B	B02	gATMm	ATM	GS	Bilallelic	N	Compound somatic + germline	0.667575	0.447525	279	226	.	.
B	B03	gATMm	ATM	GS	Bilallelic	N	Compound somatic + germline	0.390699	0.514706	99	105	.	.
B	B04	gCHEK2m	CHEK2	GS	Indeterminate	N	Low purity (pathology estimate 10%)	NA	0.477698	363	332	.	.
B	B05	gATMm	ATM	cfDNA only	NA
B	B06	gBLMm	BLM	GS	Indeterminate	N	Indeterminate; low normal VAF (41%)	0.450746	0.50885	222	230	.	.
B	B07	gCHEK2m	CHEK2	GS	Bilallelic	N	Manually reviewed in IGV; tumor VAF 100% (166/166)	0.742081	NA	0	0	.	.
B	B08	gFANCCm	FANCC	GS	Bilallelic	N	Compound somatic + germline	0.628291	0.683007	97	209	.	.
B	B09	gATMm	ATM	cfDNA only	NA	N	ACCESS only
B	B10_1	gATMm_gMUTYH	ATM	GS	Monoallelic	N	Gain of WT	0.357933	0.408511	278	192	.	.
B	B10_2	gATMm_gMUTYH	MUTYH	GS	Indeterminate	N	Low purity (pathology estimate 15%)	0.357933	0.518634	465	501	.	.
B	B11	gCHEK2m	CHEK2	GS	Monoallelic	N	Manually reviewed in IGV; tumor VAF 52% (37 DEL, 34 ref) - low coverage?	0.479591	NA	0	0	.	.
B	B12	gATMm	ATM	GS	Bilallelic	N	Compound somatic + germline	0.879463	0.903226	36	336	.	.
B	B13	gMUTYHm	MUTYH	GS	Indeterminate	N	Low purity (pathology estimate 10%)	0.2	0.522901	250	274	.	.
B	B14	gATMm	ATM	GS	Indeterminate	N	Low purity	0.152461	NA	0	0	.	.
B	B15	gATMm_gMUTYH	MUTYH	GS	Indeterminate	N	Low purity	0.165493	NA	0	0	.	.

## Sheet: patient_level
patient_id	Hugo_Symbol	biallelic?	note
P-0010210	BRCA2	TRUE	Manually reviewed in IGV; tumor VAF 80% (total count 277, 224 INS)
P-0036646	CHEK2	Indeterminate	Low purity (pathology estimate 10%)
P-0051906	ATM	TRUE	Compound somatic + germline
P-0052308	ATM	n/a	ACCESS only
P-0057387	BRCA2	TRUE
P-0061836	BRCA2	TRUE	Reversion mutation in later (post-treatment) sample
P-0062953	BRCA2	TRUE	Potential reversion mutation in later ACCESS sample
P-0065087	FANCC	TRUE
P-0065693	BRCA2	TRUE
P-0066173	BRCA2	n/a	ACCESS only
P-0067525	BLM	Indeterminate	Indeterminate; low normal VAF (41%)
P-0067539	ATM	TRUE	Compound somatic + germline
P-0067790	CHEK2	TRUE	Manually reviewed in IGV; tumor VAF 100% (166/166)
P-0070274	BRCA2	FALSE	Manually reviewed in IGV; tumor VAF 51% (196 fs del, 191 ref)
P-0070421	ATM	FALSE	Gain of WT
P-0070421	MUTYH	Indeterminate	Low purity (pathology estimate 15%)
P-0071063	MUTYH	Indeterminate	Low purity (pathology estimate 10%)
P-0075446	ATM	TRUE
P-0075446	PALB2	FALSE
P-0076097	CHEK2	FALSE	Manually reviewed in IGV; tumor VAF 52% (37 DEL, 34 ref) - low coverage?
P-0078178	ATM	Indeterminate	Low purity
P-0078244	BRCA1	n/a	No mut in IMPACT/ACCESS
P-0079195	BRCA2	TRUE	Manually reviewed in IGV; tumor VAF 66% (186 DEL, 95 ref)
P-0079260	PALB2	TRUE
P-0079351	BRCA1	n/a	ACCESS only
P-0079351	BRCA2	n/a	ACCESS only
P-0081755	PALB2	FALSE	Manually reviewed in IGV; tumor VAF 50% (240 DEL, 240 ref)
P-0082913	ATM	n/a	ACCESS only
P-0083067	BRCA2	FALSE	Low purity (pathology estimate 20%) but likely monoallelic (tumor VAF = ~1/2 purity)
P-0084281	BRCA1	n/a	ACCESS only
P-0085646	PALB2	n/a	ACCESS only
P-0086627	BRCA1	Indeterminate	Low purity (pathology estimate 10%)
P-0088966	BRCA2	n/a	No mut in IMPACT/ACCESS
P-0091102	BRCA1	n/a	No mut in IMPACT/ACCESS
P-0091405	CHEK2	TRUE
P-0091405	PALB2	n/a	No mut in IMPACT/ACCESS
P-0092004	PALB2	n/a	No mut in IMPACT/ACCESS
P-0093132	BRCA1	TRUE	Compound somatic + germline
P-0093900	ATM	Indeterminate	Low purity
P-0093900	MUTYH	Indeterminate	Low purity
P-0093926	BRCA1	n/a	No mut in IMPACT/ACCESS
P-0094283	BRCA2	Indeterminate	Low purity (pathology estimate 10%)
P-0095312	BRCA2	n/a	ACCESS only
P-0098178	BRCA2	TRUE	Compound somatic
